# Supplementary material for: Isotope dilution-liquid chromatography-tandem mass spectrometry-based candidate reference measurement procedures for the quantification of 24 (R) ,25-dihydroxyvitamin D2 and 24 (R) ,25-dihydroxyvitamin D3 in human serum and plasma
Source: publisher site journal article supplement (doi:10.1515/cclm-2024-1139), 2025-03-05
Supplement: Supplementary file 2 [file j_cclm-2024-1139_suppl_002.docx]

**Isotope dilution-liquid chromatography-tandem mass spectrometry-based candidate reference measurement procedures for the quantification of 24(R),25-dihydroxyvitamin D2 and 24(R),25-dihydroxyvitamin D3 in human serum and plasma**

**Short title:** ID-LC-MS/MS-based candidate RMPs for the quantification of 24*(R)*,25-dihydroxyvitamin D2 and D3

Kerstin Kandlera, Michael Stadlmeiera, Neeraj Singha, Friederike Baulandb, Andrea Geistangera, Christian Geletnekya, Judith Taibona*

aRoche Diagnostics GmbH, Nonnenwald 2, 82377 Penzberg, Germany

bChrestos Concept GmbH & Co. KG, Girardestaße 1–5, 45131 Essen, Germany

**Correspondence:**

Judith Taibon, PhD

Roche Diagnostics GmbH, Nonnenwald 2, 82377 Penzberg, Germany

Phone: +49 8856 6012941

Email: judith.taibon@roche.com

Content

[1 Summary of test principle and scope of application 3](#_Toc167968164)

[2 Safety precautions 4](#_Toc167968165)

[3 Equipment and instrumentation 4](#_Toc167968166)

[4 Preparation of reagents, calibration standards, controls and all other materials 6](#_Toc167968167)

[4.1 Chemicals and reagents 7](#_Toc167968168)

[4.2 Preparation of reagents 8](#_Toc167968169)

[4.2.1 Stock solutions 8](#_Toc167968170)

[4.2.2 HPLC solvents 8](#_Toc167968171)

[4.2.3 Solutions for spiking & sample preparation 9](#_Toc167968172)

[4.3 Preparation of Calibration standards and Controls 9](#_Toc167968173)

[4.3.1 24*(R),*25-(OH)2-D3 stock solutions 10](#_Toc167968174)

[4.3.2 24*(R)*,25-(OH)2-D3 dilutions 10](#_Toc167968175)

[4.3.3 Calibrator and QC spike solutions 12](#_Toc167968176)

[4.3.4 Serum calibrator preparation 13](#_Toc167968177)

[4.3.5 Control preparation 14](#_Toc167968178)

[4.3.6 Secondary reference material and native controls 15](#_Toc167968179)

[4.4 Internal standard (ISTD) solution 16](#_Toc167968180)

[4.4.1 ISTD dilution 16](#_Toc167968181)

[4.4.2 ISTD working solution 16](#_Toc167968182)

[4.4.3 ISTD Mix working solution for the quantification of 24(*R*),25-dihydroxyvitamin D2 and 24(*R*),25-dihydroxyvitamin D3 from one sample 17](#_Toc167968183)

[4.5 Preparation of system suitability test (SST) samples 18](#_Toc167968184)

[4.5.1 3-Epi-24*(R)*,25-(OH)2-D3 dilution 18](#_Toc167968185)

[4.5.2 Preparation of SST1 and SST2 18](#_Toc167968186)

[5 Specimen collection, storage and handling procedure 19](#_Toc167968187)

[5.1 Sample preparation 20](#_Toc167968188)

[6 Instrument parameters, system suitability test (SST) criteria and structure of analytical series 22](#_Toc167968189)

[6.1 LC-MS system parameters parameters 22](#_Toc167968190)

[6.1.1 LC-Parameters 22](#_Toc167968191)

[6.1.2 Source and scan parameters 26](#_Toc167968192)

[6.2 System suitabilty test 29](#_Toc167968193)

[6.3 System maintenance 29](#_Toc167968194)

[6.4 Calibration 30](#_Toc167968195)

[6.5 Structure of an analytical series 31](#_Toc167968196)

[7 Data processing and calculation of measurement results 32](#_Toc167968197)

[8 Reporting of results 33](#_Toc167968198)

[9 List of abbreviations 33](#_Toc167968199)

# Summary of test principle and scope of application

A quantitative ID-LC-MS/MS reference measurement procedure for the determination of the vitamin D metabolite 24*(R)*,25-dihydroxyvitamin D3 (24*(R),*25-(OH)2-D3) in human serum and plasma is presented. The method allows the measurement of 24*(R)*,25-(OH)2-D3 in the range of 0.150 – 18.0 ng/mL. The performance of the procedure enables its use for the evaluation and standardization of routine assays and for the evaluation of patient samples to ensure traceability of individual patient results. To minimize matrix effects and co-elution of isobaric interferences, a two-dimensional heart-cut LC approach is utilized. By this, potentially interfering substances such as 3-epi-24*(R)*,25-dihydroxyvitamin D3, 23(*S*),25-dihydroxyvitamin D3 and 25,26-dihydroxyvitamin D3 do not interfere with the quantification of 24*(R)*,25-dihydroxyvitamin D3.

In short, 400 µL sample (calibrators, quality controls or unknown serum/plasma samples) and 40 µL isotopically labeled internal standard (ISTD) solution (24*(R)*,25-dihydroxyvitamin D3 - 26, 26, 26, 27, 27, 27-d6) are mixed and incubated on an overhead rotation mixer for 15 minutes at room temperature. After equilibrium is reached, analytes are released from Vitamin D binding proteins by addition of carbonate buffer. Further purification is carried out via SLE. The mass spectrometer is operated in positive electrospray ionization mode. Analyte detection is performed in MRM mode (multiple reaction monitoring), analyzing both quantifier and qualifier transitions for analyte and ISTD. The samples are injected and separated on a Fisher Scientific Hypersil Gold C4 (50 x 2.1 mm, 1.9 µm) column in the first dimension and on a Phenomenex Kinetex F5 (100 x 2.1 mm, 1.7 µm) column in the second dimension. Mobile phases consist of water (A1), water containing 0.2 mm ammonium fluoride (A2) and methanol (B).

Calibration and subsequent quantification is performed using the peak area ratios between analyte and ISTD quantifier peak areas of a dilution series as the response.

The peak area ratios are plotted over the known concentrations of the calibrators in the dilution series to create a calibration curve. The mass concentration of analyzed samples is then determined using their specific responses.

# Safety precautions

**CAUTION:** Observe universal safety precautions, wear laboratory coats, safety glasses, and protective gloves during all steps of this method. Consider all serum/plasma specimens received for analysis as potentially infectious. We recommend the handling of biological materials in a microbiological safety cabinet. All areas in which biological material was handled have to be disinfected after work is completed. Any residual sample material as well as any plastic or glassware that contacts biological material has to be disposed by autoclaving; liquid waste has to be chemically deactivated.

**CAUTION:** For all chemicals, reagents and solvents used in this reference measurement procedure, material safety data sheets (MSDS’) have to be considered, which can be obtained from the respective suppliers.

# Equipment and instrumentation

| Instrument: | Triple quadrupole mass spectrometer coupled to a High Pressure Liquid Chromatography System with two pumps and a two position 6-port switching valve  e.g. Thermo Fisher TSQ Altis coupled to a Thermo Fisher Vanquish Horizon *)  *)The described hardware may be substituted by all triple quadrupole mass spectrometers with an ESI source coupled to an LC-system with two pumps and a two position 6-port switching valve with comparable specifications (resolution, sensitivity and mass range), provided that the system suitability test criteria are met. |
| --- | --- |
| Analysis column: | 1st dimension: Fisher Scientific Hypersil Gold C4, 50 x 2.1 mm, 1.9 µm;  2nd dimension: Phenomenex Kinetex F5, 100 x 2.1 mm, 1.7 µm |
| Pre Column Filter: | UltraShield UHPLC PreColumn Filter, Restek 0.5 µm frit |
| Pipettes: | e.g. Eppendorf Reference, variable 10 – 100 µL;  Eppendorf Reference, variable 20 – 200 µL;  Eppendorf Reference, variable 100 – 1000 µL;  Eppendorf Multipette E3 or E3x (with Combitips advanced®) |
| Analytical balance: | e.g. Mettler Toledo ultra micro balance XP6U/M |
| Centrifuges: | e.g. Eppendorf 5430R and 5810R |
| Vacuum manifold: | e.g. Supelco Visiprep with disposable PTFE liner |
| Evaporation system: | e.g. Biotage TurboVap LV |
| Thermomixer: | e.g. Eppendorf 5382 thermomixer C |
| Vortexer: | e.g. VWR Analog Vortex Mixer |
| Magnetic Stirrer: | e.g. IKA C-Mag MS4 |
| Overhead rotation mixer: | e.g. Sarstedt Sarmix M2000 |
| Reaction tubes: | e.g. Sarstedt, Micro tubes 0.5 mL, PP brown;  Sarstedt, Micro tubes 2.0 mL, PP brown;  Eppendorf, conical tubes 15 mL, PP, ambra |
| Screw caps: | e.g. VWR, flat screw caps for microcentrifuge tubes (not transparent) |
| Centrifuge tubes: | e.g. VWR, conical, 10 mL, without screw cap |
| Plugs for centrifuge tubes: | e.g. VWR, lamellar plugs, 16 mm |
| SLE columns: | e.g. Phenomenex SLE Novum, 6cc tube |
| Centrifuge filter: | e.g. VWR, centrifuge filter, 0.22 µm |
| Headspace vials: | e.g. Machery-Nagel, HS Vials, 10 mL, N18, amber glass, with Machery-Nagel screw closure, N18, metal, Butyl/PTFE |
| Sample vials: | e.g. VWR, 1.5 mL, amber glass |
| Microinserts: | e.g. VWR micro insert, 0.1 mL, 31 x 6 mm, clear, 15 mm top |
| Vial caps: | e.g. VWR, PP Screw Cap, 9 mm;  e.g. VWR, PP Screw Cap, ND13 |
| Volumetric flasks: | e.g. USP-certificated e.g. Brand, 5, 20, 50, 100 and 250 mL |
| Screw cap bottles (glass): | e.g. Pyrex borosilicate glass bottles 1000 ml, with S.C.A.T safety caps |

# Preparation of reagents, calibration standards, controls and all other materials

For all listed chemicals different vendors/producers can be used, provided that the corresponding qualities are available. For all chemicals, reagents and solvents used in this reference measurement procedure, material safety data sheets (MSDS’) have to be considered. All reagents/solutions have to be marked with hazard symbols.

Certified reference materials, which fit the intended use, must be utilized if available. A given certified reference material is supported by documentation containing source of material, measurement results and metrological traceability. If another material is used, the determination of the absolute content including measurement uncertainty by qNMR analysis is mandatory.

The ultra-microbalance used has to be calibrated and certified. The minimum sample weight has to be determined according to USP guidelines (USP Chapters 41 and 1251). Each weighing process has to be in accordance with the determined minimum sample weight.

Pipettes used have to be calibrated and certified by the manufacturer. The requalification intervals have to be compliant with the requirements communicated by the manufacturers. For pipetting organic solvents and body fluids, e.g. serum, solely use direct displacement pipettes.

For the preparation of stock and spike solutions, volumetric glassware has to be of highest quality with highest accuracy of measurement and has to fulfill requirements of ISO 1042 and USP. Glassware with USP individual certificate is required.

Vitamin D metabolites are sensitive to external influences. Precautions should be taken to avoid exposure to strong UV light, direct sunlight and heat. Work, which is done under a microbiological safety cabinet, needs to be carried out with lights off, reaction tubes need to be amber. If it is not possible to use amber reaction tubes, samples need to be covered with aluminum foil.

## Chemicals and reagents

**Table 1:** Overview of chemicals and reagents.

| **Material** | **Vendor / producer** |
| --- | --- |
| 24*(R)*,25-Dihydroxyvitamin D3 (Secalciferol)  CAS: 55721-11-4 | MedChemExpress  Cat. No. : HY-32343 |
| 24*(R)*,25-Dihydroxyvitamin D3 calibration solution in ethanol | NIST  Cat. No.: SRM 2971 |
| 24*(R)*,25-Dihydroxyvitamin D3-(26, 26, 26, 27, 27, 27)‑d6  approx. 100 µg/mL in ethanol | IsoSciences  Cat. No.: S13043-0.1 |
| 3-Epi-24*(R)*,25-dihydroxyvitamin D3,  approx. 100 µg/mL in ethanol | IsoSciences  Cat. No. : S13127-0.1 |
| Vitamin D Metabolites in Frozen Human Serum (High Level) | NIST  Cat. No.: SRM 2973 |
| Methanol absolute, ULC/MS grade  CAS: 67-56-1 | Biosolve  Cat. No.: 0013684102BS |
| Ethanol absolute for analysis  CAS: 64-17-5 | Merck  Cat. No.: 1.00983.2511 |
| Ammonium fluoride  CAS: 12125-01-8 | Sigma Aldrich  Cat. No.: 338869-25G |
| Sodium carbonate  CAS: 497-19-8 | Sigma-Aldrich  Cat. No.: S7795-500G |
| Sodium hydrogen carbonate  CAS: 144-55-8 | Merck  Cat. No.: 1.06329.0500 |
| Ethyl acetate  CAS: 141-78-6 | Merck  Cat. No.: 1.00868.2500 |
| Vitamin D depleted serum | Roche, Serum human Vit. D depleted  Mat. Nr.: 06484476001 |
| Ultrapure Water | Milli-Q IQ 7000 system (Merck) |

## Preparation of reagents

If the volume of solutions for either sample preparation or chromatographic analysis is not sufficient, a whole multiple of the given volume has to be prepared as described. Final volumes are combined prior to use. Before use, volumetric flasks are cleaned 2 times with ultrapure water, 2 times with ethanol and 2 times with the solvent that will be used to fill up the flask. The use of a dishwasher is not suitable for USP volumetric flasks. Measuring cylinders and screw cap bottles are cleaned with the solvent that is used for eluent preparation.

### Stock solutions

#### 0.5 m Aqueous ammonium fluoride

Weigh 185 mg ammonium fluoride (NH4F, Mw = 37.04 g/mol) into a 10 mL volumetric flask. Fill the flask to the mark with ultrapure water. Shake thoroughly until the solution is clear. Aliquot to portions of 450 µL in screw capped reaction tubes.

Store at ‑20 °C for a maximum of 3 months.

### HPLC solvents

#### Eluent A1: Ultrapure water

Fill 1 L ultrapure water into a screw cap bottle (glass).

Store at room temperature. Eluent A1 is usable for a maximum of 1 week.

#### Eluent A2: 0.2 mm aqueous ammonium fluoride

Use a measuring cylinder and add 1 L ultrapure water into a screw cap bottle (glass). Add 0.4 mL of 0.5 m aqueous ammonium fluoride solution and mix sufficiently, e.g. with a magnetic stir bar.

Store at room temperature. Eluent A2 is usable for a maximum of 1 week.

#### Eluent B: Methanol

Fill approximately 2 L methanol into a screw cap bottle (glass).

Store at room temperature. Eluent B is usable for a maximum of 6 months.

#### Autosampler wash solution (80% MeOH(aq) v/v)

In a 1 L screw cap bottle (glass), using measuring cylinders, add 800 mL methanol and 200 mL ultrapure water. Mix sufficiently, e.g. with a magnetic stir bar.

Store 80% MeOH(aq) at room temperature for maximum 6 months.

### Solutions for spiking & sample preparation

#### 50% ethanol(aq) (v/v)

Using measuring cylinders, 1000 mL ethanol are mixed with 1000 mL ultrapure water in a 2 L screw cap bottle (glass) using a magnetic stir bar.

Store 50 % ethanol at room temperature for a maximum of 3 months.

#### Protein release reagent (50 mm aqueous carbonate buffer)

Measure approximately 100 mL ultrapure water in a 500 mL measuring cylinder. Weigh 1.15 g Na2CO3 (Mw=105.99 g/mol) and 1.20 g NaHCO3 (Mw=84.01 g/mol) and place it in the measuring cylinder. Ensure that the mixture is sufficiently mixed, and check the pH-value. pH should be 9.8 ± 0.2 and can be adjusted with 2 m HCl(aq) or 2 m NaOH(aq), if required. Afterwards, fill up to 500 mL with ultrapure water and mix using a magnetic stir bar.

Store protein release reagent at room temperature for a maximum of 3 months.

#### Resuspension solution (80% MeOH(aq) v/v)

In a 500 mL screw cap bottle (glass), using measuring cylinders, mix 400 mL methanol with 100 mL ultrapure water.

Store 80% MeOH(aq) at room temperature for maximum 6 months.

## Preparation of Calibration standards and Controls

As primary material 24*(R)*,25-dihydroxyvitamin D3 (secalciferol) from MedChemExpress (HY-32343) is used. In this case, **no certificate is provided by the vendor**, therefore the **determination of the absolute content by qNMR analysis is mandatory** for each batch that is used.

For pipetting solely use a Eppendorf Multipette (XStream or E3) with the corresponding pipette tips as described in the following sections.

**Note: Final calibrator concentrations are allowed to vary for a maximum of ± 5 % from the target concentrations. To ensure this, the purity of the analyte must be considered during the weighing process. The amount to weigh in *mto weigh* is calculated by dividing the target mass *mtarget* by the purity factor *fp* (with ): .**

***mto weigh*is allowed to vary by ±5%. Every weighing has to adhere to this *mto weigh* range.**

**If other pipettes or glassware are used, the uncertainty needs to be re-calculated.**

### 24*(R),*25-(OH)2-D3 stock solutions

**Table 2:** Material required for the preparation of stock solutions.

| **Material** | **Amount required** | **ID No.** |
| --- | --- | --- |
| 24*(R)*,25-Dihydroxyvitamin D3 (Secalciferol) | 3 mg | MedChemExpress, HY-32343 |
| EtOH | 3 mL | -- |

**24*(R)*,25-(OH)2-D3 stock solution #1:**

*mtarget* is 1.00 mg. Calculate *mto weigh* and weigh this amount of 24*(R)*,25-dihydroxyvitamin D3 directly into a 1.5 mL sample vial (amber). Then pipette 1000 µL (Combitip advanced® 1.0 mL) EtOH into the sample vial and mix thoroughly by vortexing. The resulting concentration is ca. *1 mg/mL*.

**24*(R)*,25-(OH)2-D3 stock solution #2:**

*mtarget* is 1.00 mg. Calculate *mto weigh* and weigh this amount of 24*(R)*,25-dihydroxyvitamin D3 directly into a 1.5 mL sample vial (amber). Then pipette 1000 µL (Combitip advanced® 1.0 mL) EtOH into the sample vial and mix thoroughly by vortexing. The resulting concentration is ca. *1 mg/mL*.

**24*(R)*,25-(OH)2-D3 stock solution #3:**

*mtarget* is 1.00 mg. Calculate *mto weigh* and weigh this amount of 24*(R)*,25-dihydroxyvitamin D3 directly into a 1.5 mL sample vial (amber). Then pipette 1000 µL (Combitip advanced® 1.0 mL) EtOH into the sample vial and mix thoroughly by vortexing. The resulting concentration is ca. *1 mg/mL*.

### 24*(R)*,25-(OH)2-D3 dilutions

**24*(R)*,25-(OH)2-D3 dilution #1**

**Table 3:** Required material for the preparation of 24(R),25-(OH)2-D3 dilution #1.

| **Material** | **Volume required** | **Reference** |
| --- | --- | --- |
| 24(R),25-(OH)2-D3 stock solution #1 | 500 µL | See section 4.3.1 |
| 50% EtOH(aq) | ≈ 100 mL | See section 4.2.3.1 |

Pipette 500 µL (Combitip advanced® 0.5 mL) 24(R),25-(OH)2-D3 stock solution #1 into a 100 mL volumetric flask. Afterwards, fill the volumetric flask up to the calibration mark with 50% EtOH(aq) and mix thoroughly. The resulting concentration is ca. *5 µg/mL.*

**24*(R)*,25-(OH)2-D3 dilution #2**

**Table 4:** Required material for the preparation of 24(R),25-(OH)2-D3 dilution #2.

| **Material** | **Volume required** | **Reference** |
| --- | --- | --- |
| 24(R),25-(OH)2-D3 stock solution #2 | 500 µL | See section 4.3.1 |
| 50% EtOH(aq) | ≈ 50 mL | See section 4.2.3.1 |

Pipette 500 µL (Combitip advanced® 0.5 mL) 24(R),25-(OH)2-D3 stock solution #2 into a 50 mL volumetric flask. Afterwards, fill the volumetric flask up to the calibration mark with 50% EtOH(aq) and mix thoroughly. The resulting concentration is ca. 10 *µg/mL.*

**24*(R)*,25-(OH)2-D3 dilution #3**

**Table 5:** Required material for the preparation of 24(R),25-(OH)2-D3 dilution #3.

| **Material** | **Volume required** | **Reference** |
| --- | --- | --- |
| 24(R),25-(OH)2-D3 stock solution #3 | 500 µL | See section 4.3.1 |
| 50% EtOH(aq) | ≈ 100 mL | See section 4.2.3.1 |

Pipette 500 µL (Combitip advanced® 0.5 mL) 24(R),25-(OH)2-D3 stock solution #3 into a 100 mL volumetric flask. Afterwards, fill the volumetric flask up to the calibration mark with 50% EtOH(aq) and mix thoroughly. The resulting concentration is ca. 5*µg/mL.*

### Calibrator and QC spike solutions

**Table 6:** Required materials for the preparation of calibrator and QC spike solutions.

| **Material** | **Volume required** | **Reference** |
| --- | --- | --- |
| 24*(R)*,25-(OH)2-D3 dilution #1 | 2075 µL | See section 4.3.2 |
| 24*(R)*,25-(OH)2-D3 dilution #2 | 1800 µL | See section 4.3.2 |
| 24*(R)*,25-(OH)2-D3 dilution #3 | 1200 µL | See section 4.3.2 |
| 50% EtOH(aq) | ≈ 805 mL | See section 4.2.3.1 |

Prepare calibrator and QC spike solutions as follows:

Pipette the volumes listed in the following table into the specified volumetric flask and fill it up to the calibration mark with 50% EtOH(aq). Mix thoroughly.

**Table 7:** Pipetting scheme for the preparation of calibrator and QC spike solutions.

|  | **24*(R)*,25-(OH)2-D3 dilution**  **#** | **V working solution to add [µL]** | **Combitip advanced® to use** | **V volumetric flask [mL]** | **Approx. final concentration [ng/mL]** |
| --- | --- | --- | --- | --- | --- |
| **Spike Cal 1** | 1 | 375 | 0.5 mL | 250 | 7.50 |
| **Spike Cal 2** | 2 | 375 | 0.5 mL | 250 | 15.0 |
| **Spike Cal 3** | 1 | 500 | 0.5 mL | 100 | 25.0 |
| **Spike Cal 4** | 2 | 375 | 0.5 mL | 50 | 75.0 |
| **Spike Cal 5** | 1 | 600 | 1.0 mL | 20 | 150 |
| **Spike Cal 6** | 2 | 600 | 1.0 mL | 20 | 300 |
| **Spike Cal 7** | 1 | 600 | 1.0 mL | 5 | 600 |
| **Spike Cal 8** | 2 | 450 | 0.5 mL | 5 | 900 |
| **Spike QC 1** | 3 | 450 | 0.5 mL | 100 | 22.5 |
| **Spike QC 3** | 3 | 750 | 1.0 mL | 5 | 750 |

**Table 8:** Required materials for the preparation of spike QC 2.

| **Material** | **Volume required** | **ID No.** |
| --- | --- | --- |
| 24*(R)*,25-Dihydroxyvitamin D3 calibration solution in ethanol | 500 µL | NIST SRM 2971 |
| Ultrapure water | 500 µL | -- |

Using Combitip advanced® 0.5 mL pipette tips for each liquid, pipette 500 µL NIST SRM 2971 and 500 µL ultrapure water into a 1.5 mL amber sample vial. Mix thoroughly. Calculate the resulting concentration from the given certificate concentration.

Store aliquots of ca. 150 µL (Spike QC2) or ca. 350 µL (all other spike solutions) in amber 1.5 mL sample vials at ‑80 °C for a maximum of 70 weeks until use.

### Serum calibrator preparation

**Table 9:** Required materials for the preparation of serum calibrators.

| **Material** | **Reference / ID number** |
| --- | --- |
| Spike Cal 1 – 8 | See section 4.3.3 |
| 50% EtOH(aq) | See section 4.2.3.1 |
| Vitamin D depleted human serum | Roche, Serum human VitD total, depleted; Mat.-#: 06484476001 |

**Note: The used vitamin D depleted serum needs to be checked for residual content of 24(*R)*,25-(OH)2-D3 prior to use. Residual content of 24(*R)*,25-(OH)2-D3 has to be less than 10% of Cal 1.**

For each calibrator, transfer 4900 µL (Combitip advanced® 5.0 mL) vitamin D depleted serum into a 15 mL amber Eppendorf tube. Next, add 100 µL (Combitip advanced® 0.1 mL) of the respective calibrator spike solution Spike Cal 1 - 8.

For the preparation of the zero sample, transfer 4900 µL vitamin D depleted serum (Combitip advanced® 5.0 mL) into a 15 mL amber Eppendorf tube and add 100 µL 50% EtOH(aq) (Combitip advanced® 0.1 mL).

The zero sample and calibrators are incubated on an overhead mixer at 30 rpm and room temperature for at least 30 minutes.

Afterwards, aliquots of 450 µL from each sample are pipetted into 0.5 mL amber micro tubes and can be stored at ‑80 °C for a maximum of 6 weeks until use.

This results in the following theoretical concentrations:

**Table 10:** Theoretical serum calibrator concentrations.

| **Sample** | **c(24*(R)*,25-(OH)2-D3)**  **[ng/mL]** |
| --- | --- |
| **Zero** | 0 |
| **Cal 1** | 0.150 |
| **Cal 2** | 0.300 |
| **Cal 3** | 0.500 |
| **Cal 4** | 1.50 |
| **Cal 5** | 3.00 |
| **Cal 6** | 6.00 |
| **Cal 7** | 12.0 |
| **Cal 8** | 18.0 |

The exact effective calibrator concentrations considering purity and amount weighed have to be calculated and used for further evaluation (see chapter 6.4 and chapter 7).

### Control preparation

**Table 11:** Required material for the preparation of control samples.

| **Material** | **Reference / ID number** |
| --- | --- |
| Spike QC 1 – 3 | See section 4.3.3 |
| Vitamin D depleted serum | Roche, Serum human VitD total, depleted; Mat.‑#: 06484476001 |

**Note: The used vitamin D depleted serum needs to be checked for residual content of 24(*R)*,25-(OH)2-D3 prior to use. Residual content of 24(*R)*,25-(OH)2-D3 has to be less than 10% of Cal 1.**

For each serum calibrator control sample, transfer 4900 µL (Combitip advanced® 5.0 mL) vitamin D depleted serum into a 15 mL amber Eppendorf tube. Next, add 100 µL (Combitip advanced® 0.1 mL) of the respective calibrator spike solution Spike QC 1 – 3.

The controls are incubated on an overhead mixer at 30 rpm and room temperature for at least 30 minutes.

Afterwards, aliquots of 450 µL from each sample are pipetted into 0.5 mL amber micro tubes and can be stored at ‑80 °C for a maximum of 6 weeks until use.

This results in the following theoretical concentrations:

**Table 12:** Theoretical serum control concentrations.

| **Sample** | **c(24*(R)*,25-(OH)2-D3)**  **[ng/mL]** |
| --- | --- |
| **QC 1** | 0.450 |
| **QC 2** | 8.31 |
| **QC 3** | 15.0 |

The exact effective quality control concentrations considering purity and amount weighed (QC 1 & QC3) or the current certificate value for QC2 have to be calculated and used for further evaluation (see chapter 7).

### Secondary reference material and native controls

**NIST SRM 2973**

NIST SRM 2973, a certified standard reference material, is provided as a set of two 1 mL vials of frozen human serum. The certified value for 24*(R)*,25-(OH)2-D3is3.13 ± 0.11 ng/mL*,* but this value may be updated within revisions of the certificate*.* The instruction for storage and use is described in the certificate of analysis. Store 440 µL aliquots at ‑80 °C.

Secondary reference materials should be used whenever they are available.

Other certified reference materials can be used, if available in required qualities (e.g. NIST SRM 972a).

**Patient control sample**

In addition, one native anonymized patient sample or spiked native sample is used as a quality control sample to establish a control chart. When starting with a new batch of patient samples, an overlap of at least six measurements between old and new samples has to be ensured.

Store aliquots of 450 µL at ‑80 °C.

## Internal standard (ISTD) solution

### ISTD dilution

**Table 13:** Required material for the preparation of the ISTD dilution.

| **Material** | **Volume required** | **Reference / ID number** |
| --- | --- | --- |
| 24*(R)*,25-Dihydroxyvitamin D3-(26, 26, 26, 27, 27, 27)-d6 solution in ethanol | 500 µL | IsoSciences, S13043-0.1 |
| 50% EtOH(aq) | ≈ 50 mL | See section 4.2.3.1 |

The given certificate concentration of the 24*(R)*,25-dihydroxyvitamin D3-(26, 26, 26, 27, 27, 27)-d6 solution in ethanol has to be within 100 ± 15 µg/mL. If the concentration deviates from this value, the amount of solution and/or EtOH pipetted must be adjusted for compensation to reach the target concentration of 1000 ng/mL.

If the concentration is within specifications, into a 50 mL volumetric flask, pipette 500 µL 24*(R)*,25-dihydroxyvitamin D3-(26, 26, 26, 27, 27, 27-d6) solution in ethanol (Combitip advanced® 0.5 mL). Fill to the calibration mark with 50% EtOH(aq) and mix thoroughly. The resulting concentration is ca. 1000 ng/mL.

### ISTD working solution

**Table 14:** Required Material for the preparation of the ISTD working solution.

| **Material** | **Volume required** | **Reference** |
| --- | --- | --- |
| ISTD dilution | 1770 µL | See section 4.4.1 |
| 50% EtOH(aq) | ≈ 100 mL | See section 4.2.3.1 |

Into a 100 mL volumetric flask, pipette 1770 µL ISTD dilution 24*(R)*,25-(OH)2-D3-d6 (Combitip advanced® 2.5 mL). Fill to the calibration mark with 50% EtOH(aq) and mix thoroughly. The resulting concentration is approx. 17.7 ng/mL.

For further use, store aliquots of ca. 1.5 mL in amber sample vials at ‑80 °C. This volume is sufficient to prepare 35 samples.

### ISTD Mix working solution for the quantification of 24(*R*),25-dihydroxyvitamin D2 and 24(*R*),25-dihydroxyvitamin D3 from one sample

Because the sample preparation process for the quantification of both 24(*R*),25-dihydroxyvitamin D2 and 24(*R*),25-dihydroxyvitamin D3 is identical, the quantification of both analytes from a single prepared sample is possible utilizing the respective LC-MS/MS methods if both internal standards of the respective analytes are present. To enable this, an ISTD Mix working solution, containing both ISTDs, can be utilized in the sample preparation process (see section 5.1).

To prepare the required ISTD Mix working solution, follow the instructions in **Table 15**. The preparation of the required ISTD dilution of 24(*R*),25-(OH)2-D2-d6 is detailed in F_ETV_2269_EN, V01, or the respective valid stipulation document.

**Table 15:** Required Material for the preparation of the ISTD Mix working solution.

| **Material** | **Volume required** | **Reference** |
| --- | --- | --- |
| ISTD dilution (**24(*R*),25-(OH)2-D3-d6**) | 885 µL | See section 4.4.1 |
| ISTD dilution (**24(*R*),25-(OH)2-D2-d6**, ≈ 1000 ng/mL in 50% EtOH(aq)) | 825 µL | See section 4.4.2, F_ETV_2269_EN, V01, or the respective stipulation document |
| 50% EtOH(aq) | ≈ 50 mL | See section 4.2.3.1 |

Into a 50 mL volumetric flask, pipette 825 µL ISTD dilution from **24(*R*),25-(OH)2-D2-d6** (Combitip advanced® 1.0 mL) and 885 µL ISTD dilution from **24(*R*),25-(OH)2-D3-d6** (Combitip advanced® 1.0 mL). Fill to the calibration mark with 50% EtOH(aq) and mix thoroughly to prepare ISTD Mix working solution. The resulting concentration of 24(*R*),25-(OH)2-D2-d6 is approx. 16.5 ng/mL and the resulting concentration of 24(*R*),25-(OH)2-D3-d6 is approx. 17.7 ng/mL.

For further use, store aliquots of ca. 1.5 mL in amber sample vials at ‑80 °C. This volume is sufficient to prepare 35 samples.

## Preparation of system suitability test (SST) samples

### 3-Epi-24*(R)*,25-(OH)2-D3 dilution

**Table 16:** Required material for the preparation of the 3-epi-24(R),25-(OH)2-D3 dilution.

| **Material** | **Volume required** | **Reference / ID number** |
| --- | --- | --- |
| 3-Epi-24*(R)*,25-dihydroxyvitamin D3, solution in EtOH, approx. 100 µg/mL | 60 µL | IsoSciences, S13127-0.1 |
| EtOH | ≈ 5 mL | See section 4.1 |

The given certificate concentration of the 3-epi-24*(R)*,25-dihydroxyvitamin D3 solution in ethanol has to be within 100 ± 15 µg/mL. If the concentration deviates from this value, the amount of solution and/or EtOH pipetted must be adjusted for compensation to reach the target concentration of 1000 ng/mL.

If the concentration is within specifications, into an amber 10 mL headspace vial, pipette first 4940 µL EtOH (Combitip advanced® 5.0 mL), and then 60 µL 3-epi-24*(R)*,25-dihydroxyvitamin D3 solution in ethanol (Combitip advanced® 0.1 mL). Mix thoroughly. The resulting concentration is ca. 1200 ng/mL.

### Preparation of SST1 and SST2

**Table 17:** Required material for the preparation of SST1 and SST2.

| **Material** | **Volume required** | **Reference** |
| --- | --- | --- |
| Spike Cal 1 | 270 µL | See section 4.3.3 |
| Spike Cal 8 | 270 µL | See section 4.3.3 |
| 3-Epi-24*(R)*,25-(OH)2-D3 dilution | 200 µL | See section 4.5.1 |
| ISTD dilution | 48 µL | See section 4.4.1 |
| Resuspension solution (80% MeOH(aq)) | ≈ 9 mL | See section 4.2.3.3 |
| MeOH | ≈ 1 mL | See section 4.1 |

To each of two 10 mL amber headspace vial, add the following, using the pipette tips indicated at each step:

- 4240 µL resuspension dilution (Combitip advanced® 5.0 mL)
- 366 µL MeOH (Combitip advanced® 0.5 mL)
- 100 µL 3-epi-24*(R)*,25-(OH)2-D3 dilution (Combitip advanced® 0.1 mL)
- 24 µL ISTD dilution(Combitip advanced® 0.1 mL).

Then, add 270 µL of Spike Cal 1 (Combitip advanced® 0.5 mL) to one vial to generate SST1 and 270 µL of Spike Cal 8 (Combitip advanced® 0.5 mL) to the other vial to generate SST2. Mix thoroughly.

Aliquots of ca. 1 mL can be stored in 1.5 ml amber sample vials at -20 °C until use.

SST1 and SST2 correspond to ≈ 70% of Cal 1 and Cal 8 (analyte and ISTD) concentrations after sample preparation to account for process efficiency. The concentration of 3-epi-24*(R)*,25-(OH)2-D3 is chosen to be at ≈ 50% of the working range, which is expected to be higher than typical physiological levels. Final SST concentrations are as follows:

**Table 18:** Composition of SST1 and SST2.

| **Sample** | **c(24*(R)*,25-(OH)2-D3)[ng/mL]** | **c(ISTD)[ng/mL]** | **c(3-epi-24*(R)*,25-(OH)2-D3)[ng/mL]** |
| --- | --- | --- | --- |
| SST1 | 0.405 | 4.80 | 24.0 |
| SST2 | 48.6 | 4.80 | 24.0 |

# Specimen collection, storage and handling procedure

As sample matrices serum, plasma (lithium heparin plasma, K2 EDTA plasma and K3 EDTA plasma) and vitamin D depleted serum (surrogate matrix) can be used. Various freeze thaw cycles should be avoided. All native samples have to be anonymized.

**CAUTION:** Consider all serum/plasma specimen received for analysis as potentially infectious. We recommend the handling of biological materials in a microbiological safety cabinet. All areas in which biological material is handled have to be disinfected after work is completed. Any residual sample material as well as any plastic or glassware that contacts biological material has to be disposed by autoclaving; liquid waste has to be chemically deactivated.

## Sample preparation

**Table 19:** Required material for sample preparation.

| **Material** | **Required per sample** | **Reference/ID No.** |
| --- | --- | --- |
| Sample (calibrator, QC, unknown) | 400 µL | -- |
| ISTD working solution | 40 µL | See section 4.4.2 |
| Protein release reagent | 560 µL | See section 4.2.3.2 |
| SLE cartridge | 1 pc. | Phenomenex SLE Novum, 6cc |
| Ethyl acetate | 5 mL | See section 4.1 |
| Resuspension solution | 100 µL | See section 4.2.3.3 |
| Centrifuge filter, 0.22 µm | 1 pc. | See section 3 |

For the analysis of samples containing only 24*(R)*,25-dihydroxyvitamin D3, first, 40 µL (Combitip advanced® 0.2 mL, dispense mode) of ISTD working solution are transferred into a 2.0 mL brown micro tube. Next, 400 µL (Combitip advanced® 0.5 mL) of the serum calibrator/QC/unknown sample are added and samples are incubated on an overhead mixer for 15 min at 30 rpm, room temperature.

If samples for the determination of both 24*(R)*,25-dihydroxyvitamin D3 and –D2 are prepared, the sequence of ISTD and sample addition can be swapped, i.e. the serum is added first and the ISTD is added second.

In both cases, samples are then centrifuged (10 s, 3000 rcf max), 560 µL (Combitip advanced® 5.0 mL, dispense mode) of protein release reagent are added, and incubation follows on a thermomixer for 10 min at 1400 rpm, room temperature. Afterwards, samples are centrifuged (10 s, 3000 rcf max) again.

SLE is used for analyte extraction. For this, the vacuum manifold is equipped with SLE cartridges and centrifuge tubes. 950 µL (Eppendorf Reference, variable 100 – 1000 µL) of the sample is loaded onto the SLE cartridge, and a slight vacuum (> -20 kPa) is applied for ca. 5 seconds, so that all liquid is absorbed by the cartridge. Samples are allowed to incubate on the SLE cartridge for 15 minutes. Elution is performed by adding 2.5 mL (Combitip advanced® 25 mL, dispense mode) of ethyl acetate to the SLE cartridge. A slight vacuum (> -15 kPa) can be applied, but elution should happen in a dropwise manner at all times. The process is repeated once with the further addition of 2.5 mL (Combitip advanced® 25 mL, dispense mode) of ethyl acetate to the SLE cartridge, for a total elution volume of 5 mL.

The extract is evaporated to dryness under N2 (water bath temperature: 30 °C; nitrogen flow: 1.3 L/min; ca. 45 min). For resuspension, 100 µL (Combitip advanced® 1.0 mL, dispense mode) resuspension solution is added, the samples are vortexed for at least 5 seconds, centrifuged at 2000 rcf, room temperature, and then incubated for 2 minutes. For the final purification, samples are transferred onto centrifuge filters (0.22 µm) and centrifuged for 5 minutes at 11000 rcf, room temperature. Lastly, filtrates are transferred into a 100 µL micro insert contained in an amber 1.5 mL sample vial.

Samples can be stored at 6 °C for a maximum of 22 days until measurement.

A schematic overview of the sample preparation process is shown in **Figure 1**.


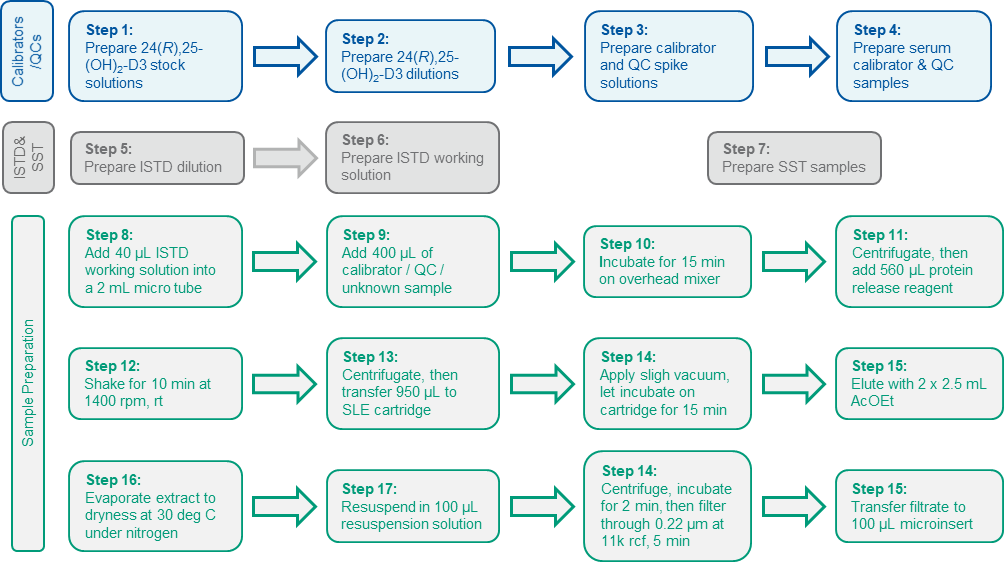


**Figure 1:** Schematic overview of the sample preparation process.

**Sample dilution:**

Highly concentrated samples (> 18.0 ng/mL) are diluted 1 part + 1 part (v + v) with “serum human Vit. D depleted” from Roche (Mat. Nr.: 06484476001) or another analyte-free stripped serum matrix.

# Instrument parameters, system suitability test (SST) criteria and structure of analytical series

The preparation of the LC-MS-System is carried out as described in the manufacturer’s instructions for use.

## LC-MS system parameters parameters

| Instrument: | Triple quadrupole mass spectrometer coupled to an high pressure liquid chromatography system with two pumps and a two position 6-port switching valve  e.g. Thermo Fisher TSQ Altis coupled to a Thermo Fisher Vanquish Horizon*  *The described hardware may be substituted by all triple quadrupole mass spectrometers with an ESI source coupled to an LC-system with two pumps, and comparable specifications (resolution, sensitivity and mass range), provided that the system suitability test criteria are met. |
| --- | --- |

### LC-Parameters

**General LC settings:**

- Analytical columns: 1st dimension: Fisher Scientific Hypersil Gold C4, 50 x 2.1 mm; 1.9 µm

with UltraShield UHPLC PreColumn Filter, Restek 0.5 µm frit

2nd dimension: Phenomenex Kinetex F5, 100 x 2.1 mm, 1.7 µm

- Heart-cut loop size: 100 µL
- Eluents: Eluent A1: Ultrapure water

Eluent A2: 0.2 mm Aqueous ammonium fluoride

Eluent B: Methanol

- Column temperature: 30 °C
- Autosampler temp.: 6 °C
- Autosampler loop size: 25 µL
- Injection volume: 15 µL

**Gradient 1st dimension:**

**Table 20:** Gradient in the 1st dimension.

| Time [min] | Flow [mL/min] | Eluent A1 [%] | Eluent B [%] |
| --- | --- | --- | --- |
| 0.0 | 0.3 | 70 | 30 |
| 0.2 | 0.3 | 70 | 30 |
| 0.3 | 0.3 | 30 | 70 |
| 5.4 | 0.3 | 30 | 70 |
| 5.5 | 0.3 | 2 | 98 |
| 7.5 | 0.3 | 2 | 98 |
| 7.6 | 0.3 | 70 | 30 |
| 14.0 | 0.3 | 70 | 30 |

**Gradient 2nd dimension:**

**Table 21:** Gradient in the 2nd dimension.

| Time [min] | Flow [mL/min] | Eluent A2 [%] | Eluent B [%] |
| --- | --- | --- | --- |
| 0.0 | 0.45 | 2 | 98 |
| 0.5 | 0.45 | 2 | 98 |
| 0.6 | 0.45 | 90 | 10 |
| 4.9 | 0.45 | 90 | 10 |
| 5.0 | 0.45 | 35 | 65 |
| 11.5 | 0.45 | 35 | 65 |
| 13.5 | 0.45 | 25 | 75 |
| 13.6 | 0.45 | 2 | 98 |
| 14.0 | 0.45 | 2 | 98 |

**Heart-cut valve switch** (see **Figure 2** for definition of valve positions):

***Table 22*** shows typical times for the heart-cut valve switching, as well as the valve position. It might be necessary to adjust the times as described below.

**Table 22:** Typical values for the hear-cut valve switching times.

| **Time [min]** | **Valve Position** |
| --- | --- |
| 0 | Position 1 |
| 3.70 | Position 2 |
| 3.95 | Position 1 |


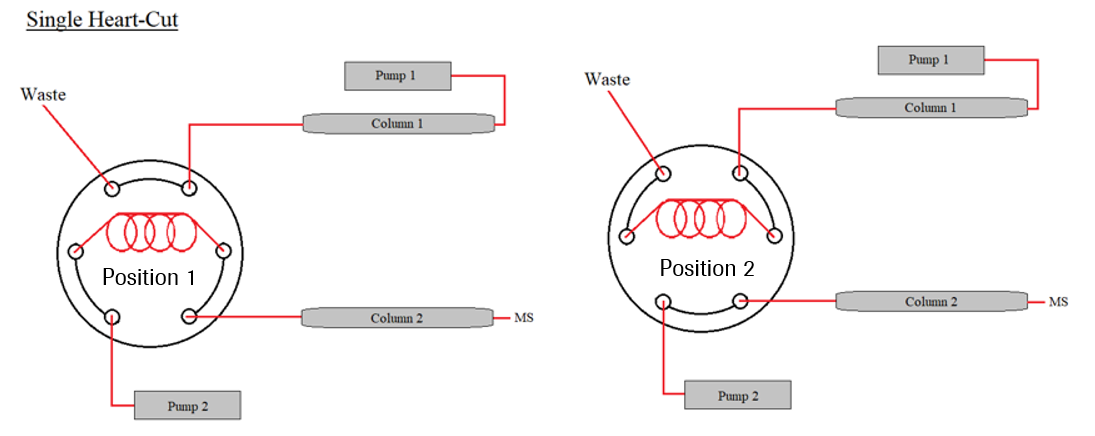


**Figure 2:** Schematic representation of the valve positions utilized in the hear cut approach.

**Note:** To transfer the analyte and ISTD after elution in the 1st dimension to the 2nd column, the heart-cut valve is switched for 0.25 min from position 1 to position 2 (see **Figure 2**). The use of different LC systems and/or new column batches might necessitate a re-evaluation of the optimal switching times for the heart-cut valve.

For heart-cut optimization, SST2 (see section 4.5.2) is utilized. First, the column in the 1st dimension is coupled to the MS directly, circumventing the heart-cut switching valve, and the retention time of the analyte after running the specified 1st dimension gradient is noted. To improve signal, eluent A2 can substitute eluent A1 for this experiment. Next, the setup is reconfigured to 2D with the specified columns. Within multiple SST2 injections, instrument methods are compared which differ in the starting point of the heart-cut, e.g. by 0.02 min, centered around the determined 1st dimension analyte retention time, e.g. 5 injections prior to, 1 injection at, and 5 injections after the retention time. All tested heart-cuts have to be 0.25 minutes wide. The optimization can stop if a decisive maximum of analyte signal is observed in one of the runs, i.e. the signal is higher than both the heart-cut windows before and after. If this is not the case, additional methods with shifted heart-cut valve switching times have to be tested until a method yielding maximal analyte signal can be chosen. This method then determines the optimized heart-cut valve switching times.

**ALS injection settings:**

- - Draw speed: 5 µL/s
  - Dispense speed: 5 µL/s
  - Wash mode: both (before and after draw)
  - Wash time: at least 15 s
  - Wash speed: 50 µL/s
  - Puncture offset: 1500 µm

**Optional divert valve:**

To reduce potential contamination of the MS, it is possible to use a divert valve, which diverts the flow during elution of the analyte from a waste-line to the MS.

**Table 23:** Divert valve switching times.

| **Time [min]** | **Valve Position** |
| --- | --- |
| 0 | To Waste |
| 12.0 | To MS |
| 13.5 | To Waste |

The divert valve switching times might be adjusted to guarantee the detection of analyte and epimer in the SST measurements.

If the divert valve is used, source voltage can be adjusted in a time-dependent manner, see section 6.1.2. After the sequence is complete, the vaporizer temperature should be set to 0 °C if no flow is applied to the H-ESI probe.

### Source and scan parameters

**Analyte and ISTD transitions:**

For the analyte 24*(R)*,25-dihydroxyvitamin D3, and the ISTD 24*(R)*,25-dihydroxyvitamin D3-(26, 26, 26, 27, 27, 27)‑d6, the following transitions were chosen for MS analysis:

**Table 24:** Mass transitions for analyte and ISTD.

| Molecule | Formula parent ion | Exact parent ion mass [Da] | Product ion type | Plausible  formula product ion | Exact product ion mass [Da] |
| --- | --- | --- | --- | --- | --- |
| 24*(R)*,25-(OH)2-D3 | [C27H45O3]+ | 417.3 | Quantifier | [C27H41O]+ | 381.3 |
| Qualifier | [C8H9O]+ | 121.1 |
| 24*(R),*25-(OH)2-D3-d6 | [C27H39D6O3]+ | 423.4 | Quantifier | [C27H35D6O]+ | 387.4 |
| Qualifier | [C8H9O]+ | 121.1 |

In the MS-method, the specified parent ion masses are set as the Q1-masses, and the product ion masses are set as the Q3-masses. Since different instruments may vary in the accuracy of their quadrupole set-points, the first decimal place of the specified exact ion masses may be varied when setting up the MS method.

**Tuning procedure**

All values given in the following section are instrument dependent and might be adjusted as described in the section below.

To determine the optimal MS parameters, analyte signal is tuned by manual injection of a 24*(R)*,25-(OH)2-D3 tune solution, which consists of ≈ 1 µg/mL 24*(R)*,25-(OH)2-D3 in 80% MeOH(aq). For this, a syringe is connected via a T-piece assembly to a HPLC-pump and the MS-system. Using a syringe pump, a stable analyte signal is created using the following settings:

- Syringe pump flow: 10 µL/min
- HPLC pump flow: 440 µL/min
- HPLC solvent constitution: 30% eluent A2, 70% eluent B

This results in a flow rate of 450 µL/min with ≈70% eluent B, which corresponds to the conditions during the method at analyte elution.

A SRM scan in positive mode is used with the following settings to check for stable analyte signal prior to starting the automatic tune procedure:

- Scan polarity: positive
- Scan type: SRM
- Q1-resolution [FWHM]: 0.7
- Precursor ion mass: *m/z* 417.3
- Q2-resolution [FWHM]: 1.2
- Product ion mass: *m/z* 381.3
- Dwell time: 100 ms
- CID gas: 1.5 mTorr
- Source fragmentation: 0 V

The automatic tuning procedure is able to determine optimal values for source- as well as scan-parameters. If an instrument without an automatic tuning procedure is used, signal can be tuned manual for both stability and intensity.

While the ISTD transitions are not tuned separately and the optimized values from the analyte transitions are taken, it is still recommended to check for presence and sufficient signal for the ISTD transitions by injection a solution with ≈ 1 µg/mL 24*(R)*,25-(OH)2-D3-d6 in 80% MeOH(aq) as described above.

The optimization of the vaporizer temperature setting of the heated ESI-probe (H-ESI) can be conducted manually, or by creating and comparing multiple methods differing only in the chosen vaporizer temperature. However, for both the manual and the method-based optimization, it is important that the set temperature is reached and stable prior to measurement.

In the following paragraphs, typical values for source- and scan-parameters are shown, which can be seen as a starting point when setting up the MS-method and can be adjusted if necessary:

**Typical global parameters (source parameters):**

A typical ESI-voltage is 3500 V for the positive ion measurements. If the optional divert valve is used, the voltage is only applied when the divert valve position results in flow to the H-ESI source. Otherwise, voltage is applied in a static manner at all times.

Using a Thermo Scientific Ion Max NG H-ESI source, a typical “front-to-back” setting is 1, a typical “rotational position” is center, and a typical “spray insert depth” is ML.

**Table 25:** Typical source parameters.

| Parameter | Value |
| --- | --- |
| Ion source type | H-ESI |
| Sheath gas [arb.] | 50 |
| Aux gas [arb.] | 25 |
| Sweep gas [arb.] | 5.3 |
| Ion transfer tube temp [°C] | 325 |
| Vaporizer temp [°C] | 275 |

**Typical SRM properties:**

**Table 26:** Typical SRM properties.

| Parameter | Value |
| --- | --- |
| Polarity | positive |
| Cycle time [s] | 0.6 |
| Q1 resolution [FWHM] | 0.7 |
| Q3 resolution [FWHM] | 1.2 |
| CID gas [mTorr] | 1.5 |
| Source fragmentation [V] | 0 |
| Chromatographic Peak Width [s] | 6 |
| Use chromatographic filter | True |

**Typical transition properties:**

**Table 27:** Typical compund transition properties. Note that only the last digits of precusor and product m/z-values are allowed to differ.

| Compound | Precursor | Product | Transition type | Collision energy [V] | RF lens  [V] | Minimum dwell time [ms] |
| --- | --- | --- | --- | --- | --- | --- |
| 24*(R)*,25-(OH)2-D3 | *m/z* 417.3 | *m/z* 381.3 | Quantifier | 9.5 | 44 | 148.3 |
| *m/z* 121.1 | Qualifier | 17.4 | 44 | 148.3 |
| 24*(R),*25-(OH)2-D3-d6 | *m/z* 423.4 | *m/z* 387.4 | Quantifier | 9.5 | 44 | 148.3 |
| *m/z* 121.1 | Qualifier | 17.4 | 44 | 148.3 |

Settings of both precursor and product *m/z*-values are specified in ***Table 24*** and are allowed to differ in the last digit if beneficial for the specific instrument quadrupole performances.

## System suitabilty test

Prior to every sequence acquired, a system suitability test (SST) is performed to do both, check if the required performance level of the LC/MS-system is attainable, and to provide data for the evaluation of long-term method performance.

The SST samples SST1 and SST2 are prepared as described in section 4.5.2. Each samples contains ISTD, the potential interferent 3-epi-24*(R),*25-(OH)2-D3 and the analyte 24*(R),*25-(OH)2-D3 at the approximate concentrations of Cal 1 for SST1 and Cal 8 for SST2, respectively.

After sufficient equilibration of the LC-system and columns utilized (see section 6.5), 15 µL each of SST1, SST2, and of a solvent blank (80% MeOH(aq), SST blank) are injected back to back in the sequence SST1, SST2, and SST blank with the LC-MS-method used for analysis.

The acceptance criteria for the SST are as follows:

- The retention time of the analyte quantifier transition signal is determined for both SST1 and SST2. To pass, the retention times in both samples have to be **12.7 ± 0.6 min**.
- Separation from the potential interferent 3-epi-24*(R),*25-(OH)2-D3 in the 2nd dimension has to be shown by calculation of the resolution REP in both SST1 and SST2 after the EP formula:

with = retention time of peak 1 and 2, respectively; and = peak width at 50% peak height of peak 1 and 2, respectively.

The calculated resolutions have to be **REP ≥ 1.5** in both SST1 and SST2 to pass the criterion.

- S/N ratio of the analyte quantifier transition in SST1 is determined (see section 7). To pass, the determined **S/N** has to be **≥ 200**.
- Potential carry-over is assessed by determining the analyte quantifier transition signal area at the specified retention time in the SST blank sample. To pass this criterion, the area has to be **≤ 20% of** the analyte quantifier area determined in **SST1**.

If all criteria are fulfilled, system suitability is shown and measurements can be started. If one or more criteria are not fulfilled, system performance has to be assessed and performance has to be improved, e.g. by changing columns, readjusting the heart-cut, tuning the source- and MS-parameters or performing system maintenance according to the manufacturer. Only if the SST is passed, measurements can begin.

## System maintenance

After analysis is finished, the whole system, including columns, is flushed with 80 % methanol(aq) for at least 15 min.

## Calibration

Calibration is done utilizing the calibrators Cal 1 – Cal 8 prepared as described in section 4.3.4. Calibrators are measured in increasing concentration to yield a calibrator block, and two injections of the same calibrators are done: one prior and one after the samples to be measured (see section 6.5).

The calibration function is obtained by fitting a quadratic model by linear regression, using the effective analyte concentrations (cA) as the x-values and the area ratios from both injections as y-values. Effective analyte concentrations, incorporating purity and the exact amount weighed in, have to be entered with 5 significant figures into the software used for linear regression. The linear regression is weighted with the factor 1/cA², and the fit is not forced through the origin. This results in the calibration function:

AR = a * cA² + b * cA + c;

with a, b, and c as the factors obtained by the weighted linear regression.

To calculate the concentration of a sample, its measured AR is used as the response, and the corresponding measured concentration is calculated with the factors given in the calibration function.

## Structure of an analytical series

All sequences have to pass the SST (see section 6.2) prior to start. For the calibrator and QC blocks, the same prepared samples are injected twice, once before and once after the unknown samples.

As solvent blank, use 80% MeOH(aq).

**SST sequence:**

- Solvent blanks (at least four times for sufficient equilibration of the 2D system)
- SST 1
- SST 2
- Solvent blank SST 1 (80% MeOH(aq))

If the SST is passed, the sequence continues with the **main sequence**:

- Solvent blank
- Zero (matrix with ISTD, without analyte)
- Solvent blank
- Calibrators (increasing concentration)
- 2 x Solvent blank
- QCs (QC 1 – 3, NIST SRM 2973 (if available), patient control sample)
- 2 x Solvent blank
- **Samples (Unknowns) *, ****
- 2 x Solvent blank
- QCs (QC 1 – 3, NIST SRM 2973, patient control sample)
- 2 x Solvent blank
- Calibrators (increasing concentration)
- Solvent blank

* If reference values should be assigned, the number of sample preparations n is dependent on the desired measurement uncertainty. Additionally, samples should be measured on at least two different days.

** If a method comparison study is performed or complaint samples are measured, samples are prepared and measured once (n = 1).

For monitoring instrument performance during the main sequence, it is possible to insert one or multiple QC-samples after measurement of 25 unknown samples each. These intermittent QC samples have to be surrounded by solvent blanks.

# Data processing and calculation of measurement results

For the raw file processing, the Thermo Scientific ™ Dionex ™ Chromeleon ™ 7.2.10 software is used. Extracted ion chromatograms for each transition are smoothed with 3 point *Gaussian* smoothing. The *Cobra* algorithm is used for peak integration with the following settings: peak integration is set to cover analyte and epimer signal, with an automatic smoothing width. Baseline noise range is set for 0.35 min prior to the peak (at a time at which the divert valve delivers flow to the MS, if the divert valve is used). Manual re-integration of peaks in which the automatic peak integration did not yield acceptable results, or the use of other peak integration algorithms, are permitted.

Area ratios are calculated in the software by dividing the analyte quantifier transition area by the ISTD quantifier transition area. For details of the calibration procedure, see section 6.4.

If mass spectrometers from other vendors are used, the raw file processing may be adjusted in the software of the specific vendor.

Effective concentrations, incorporating purity and exact amount weight in, for both calibrator and quality control samples, have to be entered into the analysis software with the unit ng/mL and five significant figures for calculations.

The reportable result is given in ng/mL with three significant figures. Measurement uncertainty SD [ng/mL] is reported with three significant figures and the CV [%] with one decimal place.

For the assignment of reference or target values, the reportable result is calculated as the arithmetic mean of n sample preparations, in which sample preparations are performed over at least two days. Measurement uncertainty is calculated and reported as total uncertainty, given by the formula:

unccal: uncertainty of calibrator preparation

uncmean: uncertainty of n sample preparations

Results of a method comparison study or complaint sample (n = 1) are reported as the reportable result with the measurement uncertainty determined within the validation:

unccal: uncertainty of calibrator preparation

uncprec: uncertainty of precision experiment within the validation

**Note:** If other pipettes or glassware than indicated are used, the uncertainty has to be recalculated.

# Reporting of results

All analysis requests are controlled by a sample management system. Each sample/sample set to be measured has to be requested using a specific order form, which includes:

- identification of source and type of sample (native samples are anonymized)
- sample receipt and latest date of measurement
- sample storage place
- reference measurement procedure employed

Within the corresponding report, results are presented as follows:

- short description on reference measurement procedure used
- observations of unusual properties of sample
- observations as unusual features of the measurement procedure or use of modifications
- results are reported with sample name / identification name, numerical value, measurement unit and measurement uncertainty if required

All data (e.g. sequences, raw data, and calculations) have to be checked in four-eyes principle, except for calculations done by a validated tool, e.g. Biowarp. The final report has to be signed from the operator and approver.

# List of abbreviations

| MRM | Multiple Reaction Monitoring |
| --- | --- |
| ID-LC-MS/MS | Isotope Dilution Liquid Chromatography Mass Spectrometry |
| SLE | Supported Liquid Extraction |
| ISTD | Internal standard |
| Id. No. | Identification number |
| ESI | Electrospray ionization |
| XIC | Extracted ion-chromatogram |
| ALS | Automated liquid sampler |
| H-ESI | Heated electrospray ionization |
| SRM | Single reaction monitoring |
