# Supplementary material for: Isotope dilution-liquid chromatography-tandem mass spectrometry-based candidate reference measurement procedures for the quantification of 24 (R) ,25-dihydroxyvitamin D2 and 24 (R) ,25-dihydroxyvitamin D3 in human serum and plasma
Source: publisher site journal article supplement (doi:10.1515/cclm-2024-1139), 2025-03-05
Supplement: Supplementary file 4 [file j_cclm-2024-1139_suppl_004.docx]

**Isotope dilution-liquid chromatography-tandem mass spectrometry-based candidate reference measurement procedures for the quantification of 24(R),25-dihydroxyvitamin D2 and 24(R),25-dihydroxyvitamin D3 in human serum and plasma**

**Short title:** ID-LC-MS/MS-based candidate RMPs for the quantification of 24*(R)*,25-dihydroxyvitamin D2 and D3

Kerstin Kandlera, Michael Stadlmeiera, Neeraj Singha, Friederike Baulandb, Andrea Geistangera, Christian Geletnekya, Judith Taibona*

aRoche Diagnostics GmbH, Nonnenwald 2, 82377 Penzberg, Germany

bChrestos Concept GmbH & Co. KG, Girardestaße 1–5, 45131 Essen, Germany

**Correspondence:**

Judith Taibon, PhD

Roche Diagnostics GmbH, Nonnenwald 2, 82377 Penzberg, Germany

Phone: +49 8856 6012941

Email: judith.taibon@roche.com

**Estimation of measurement uncertainty**

Measurement uncertainty (MU) was determined according to the GUM [1] and based on Taibon et al. [2] and considered following the main steps: uncertainty estimation of qNMR target value assignment of reference material (I), uncertainty estimation of the preparation of calibrator materials (II) and the estimation of uncertainty of the LC-MS/MS method (III).

1. ***Estimation of the uncertainty of the reference material:***

qNMR measurements were performed in six replicates using an SI traceable ISTD for the quantification of the absolute content (*Px*, purity of the analyte given as mass fraction) of the analyte. For the estimation of uncertainty, the following simplified equation was used ***equation (1)*:**

Uncertainty components of weighing, measuring and integrating are included as type A uncertainties in the qNMR measurements. Purity (*Pstd)* and uncertainty (*uncPstd)* of the ISTD are combined with the mean (*A*) and the uncertainty (*uncA)* of qNMR measurements to give the total uncertainty of the purity of the reference material *unc*(*Px*) using the following ***equation (2)*:**

1. ***Calibrator uncertainty estimation:***

Analyte concentration *C* [ng/mL] of the matrix based calibrator levels was calculated using the following ***equations (3)***:

where *M* is the weighted mass, *P* is the purity, *Vflask* is the volume of the volumetric flask, while *Vstock Vdilution,* *Vspike* and *Vserum* are pipetted volumes.

Generally, uncertainties are combined by the rules of error propagation. Let y = f(x). The uncertainty of y is approximated by the propagation of uncertainty using the following ***equation (4)***

as long as all components xi are not correlated to each other.

Calibrators are prepared in multiple steps, where Steps 1–3 can be combined in one step:

- Step 1–3: preparation of stock solution
- Step 4: preparation of working solution
- Step 5: preparation of spiking solution
- Step 6: preparation of matrix-based calibrator levels

Each step is described and uncertainties for each step are shown below.

*Step 1–3: preparation of stock solution*

For stock solution preparation, the analyte concentration C, may be calculated as ***equation (5)*:**

where *M* is the weighted mass, *P* is the purity and *V* is the volume of the volumetric flask. Applying ***equation (4)***, the corresponding concentration uncertainty (*unc(C)*) is calculated as ***equation (6)*:**

where *uncM* is the uncertainty of the microbalance, *uncP* is the uncertainty of purity estimation and *uncV* is the error of the volumetric flask.

*Step 4: preparation of working solution*

The analyte concentration (*C*)of a dilution step is calculated as ***equation (7)*:**

where *Ch* is the analyte concentration of the stock solution, *Vh* is the volume of the pipetted stock solution and *Vt* is the volume of the volumetric flask.

Applying ***equation (4)***, the corresponding uncertainty (*uncC*) is calculated as ***equation (8)*:**

where *Ch* is the analyte concentration of the stock solution, *Vh* is the volume of the pipetted stock solution, and *Vt* is the volume of the volumetric flask.

*Step 5: preparation of spike solution*

The analyte concentration (C) of the spike solution is calculated with ***equation (7)***, where *Ch* and *Vh* are the analyte concentration and the volume of the working solution. The corresponding uncertainty (*uncC*) is calculated using ***equation (8)***.

*Step 6: preparation of matrix-based calibrator levels*

The analyte concentration (*CCal*)of the matrix-based calibrator levels is calculated as ***equation (9)*:**

where *Ch* is the analyte concentration of the spike solution, *Vh* is the volume of the pipetted spike solution and *Vj*is the added volume of the pipetted calibrator matrix.

Applying ***equation (4)***, the corresponding uncertainty (*uncCal*) is calculated as ***equation (10)*:**

where *Ch* is the analyte concentration of the spike solution, *Vh* is the volume of the pipetted spike solution and *Vj* is the added volume of the pipetted calibrator matrix.

***(III) Calibrator uncertainty estimation:***

Estimation of total variability of the LC-MS/MS method was performed using a precision experiment (type A uncertainty) and considered the following steps: sample preparation of calibrators, preparation of internal standard, preparation of samples, measurement of calibrators, generation of the calibration curve and measurement and evaluation of sample results. As described above, precision was evaluated performing a multi-day validation experiment and variability components were determined using an ANOVA based variance-components analysis. Total uncertainties from precision experiment (*uncprec*) were expressed as standard deviation (SD).

The total measurement uncertainty of the whole approach for a single measurement (n=1) was estimated as a combination of the uncertainty of calibrator preparation (*unccal*) and calculated uncertainty of the precision experiment (*uncprec*) based on ***equation (11)***:

To avoid error underestimation, for each individual sample concentration level, unccal of the calibrator level with the higher uncertainty was chosen for this combination of uncertainties. The derived total uncertainty was multiplied by a coverage factor of k = 2, which corresponds to an approximate confidence level of 95% assuming a normal distribution, to obtain an expanded uncertainty.

For the assignment of reference values, multiple sample preparations for each sample were performed on at least two different days and the result was calculated as the arithmetic mean (n = x). Total measurement uncertainty was calculated as combined uncertainty of the calibrator preparation (unc*cal*) and uncertainty (SD) of the mean of measurement results (unc*mean*), as given by the following ***equation (12)***:

To avoid error underestimation, for each individual sample concentration level, unccal of the calibrator level with the highest uncertainty was chosen for this combination of uncertainties. The derived total uncertainty was multiplied by a coverage factor of k = 2, which corresponds to an approximate confidence level of 95% assuming a normal distribution, to obtain an expanded uncertainty.

**References**

1. Joint Committee for Guides in Metrology. Evaluation of measurement data – Guide to the expression of uncertainty in measurement, GUM 1995 with minor corrections. Available from: https://www.bipm.org/documents/20126/2071204/JCGM_100_2008_E.pdf/cb0ef43f-baa5-11cf-3f85-4dcd86f77bd6?version=1.10&t=1659082531978&download=true [Accessed 22 May 2024].
2. Taibon J et al. An isotope dilution-liquid chromatography-tandem mass spectrometry (ID-LC-MS/MS)-based candidate reference measurement procedure (RMP) for the quantification of aldosterone in human serum and plasma. Clin Chem Lab Med. 2023 Mar 24;61(11):1902-1916.
